# Supplementary material
Source: HighWire-hosted journal article supplement (https://www.cmajopen.ca/highwire/filestream/81295/field_highwire_adjunct_files/3/2019-0204-original-submission.pdf)
Supplement: 2019-0204-original-submission.pdf [file 2019-0204-original-submission.pdf]

1  
2  
3 **Representation of Information Regarding Vaccination on Canadian Chiropractor's**  
4  
5 **Websites: A cross-sectional study**  
6  
7  
8  
9

10 \*Yechan Kim<sup>1,2</sup>; \*Adeel M. Akhtar<sup>3,4</sup>; Shane Natalwalla<sup>5</sup>; Anna Goshua, HBSc;<sup>6</sup> Kumanan  
11  
12 Wilson, MD, MSc <sup>7,8</sup>; Jason W. Busse, DC, PhD <sup>9,10</sup>  
13

14 \*These authors contributed equally to this work.  
15  
16  
17  
18

19 <sup>1</sup> Faculty of Medicine, University of Western Ontario, London, ON, Canada.  
20

21 <sup>2</sup> Department of Medical Sciences, McMaster University, Hamilton, ON, Canada.  
22

23 <sup>3</sup> Department of Health Sciences, McMaster University, Hamilton, ON, Canada  
24

25 <sup>4</sup> Faculty of Medicine, Royal College of Surgeons in Ireland, Dublin  
26

27 <sup>5</sup> Faculty of Medicine, University of Toronto, Toronto, ON, Canada.  
28

29 <sup>6</sup> School of Medicine, Stanford University, Stanford, California, USA.  
30

31 <sup>7</sup> Department of Medicine, Clinical Epidemiology Program. Ottawa Hospital, Ottawa, ON,  
32  
33 Canada.  
34

35 <sup>8</sup> Bruyère Research Institute, Ottawa, ON, Canada.  
36

37 <sup>9</sup> Department of Anesthesia, McMaster University, Hamilton, ON, Canada.  
38

39 <sup>10</sup> Department of Health, Evidence & Impact, McMaster University, Hamilton, ON, Canada.  
40  
41  
42  
43  
44  
45  
46

47 **Corresponding Author:** Jason W. Busse, Department of Anesthesia, Michael G. DeGroote  
48

49 School of Medicine, McMaster University, HSC-2V9, 1280 Main St. West, Hamilton, Canada,  
50

51 L8S 4K1; email: bussejw@mcmaster.ca  
52  
53  
54  
55  
56  
57  
58  
59  
60

1  
2  
3  
4  
5  
6  
7  
8  
9  
10  
11  
12  
13  
14  
15  
16  
17  
18  
19  
20  
21  
22  
23  
24  
25  
26  
27  
28  
29  
30  
31  
32  
33  
34  
35  
36  
37  
38  
39  
40  
41  
42  
43  
44  
45  
46  
47  
48  
49  
50  
51  
52  
53  
54  
55  
56  
57  
58  
59  
60

**Funding:** No funds were received for the preparation of this manuscript.

Confidential

## Abstract

**Background:** Vaccination is a contentious issue for some chiropractors.

**Methods:** In 2015/2016, we generated a database of all licensed chiropractors in Canada and identified chiropractor's websites that provided information on vaccination. We assessed the quality of vaccination information using the Web Resource Rating Tool (WRRT), determined whether vaccination was portrayed in a positive, neutral, or negative manner, and conducted a thematic analysis of vaccination-related content. We revisited all identified websites in 2019 to explore the impact of media attention regarding anti-vaccination statements by chiropractors.

**Results:** Among 9,131 chiropractors practising in Canada in 2016, 94 unique websites met our criteria; 17% (16) were positive, 20% (19) neutral, and 63% (59) negative towards vaccination. The four themes we identified were: (1) there are effective alternatives to vaccination, (2) vaccination is harmful, (3) evidence for and against vaccination, and (4) concerns with health policy regarding vaccination. The quality of vaccination content present on these websites was generally poor with a median WRRT score of 19% (interquartile range, 14% to 30%). When the same websites were followed up in 2019, 47% (45 of 94) had either removed all vaccination content or discontinued the website entirely. The majority (33 of 45; 73%) of websites/material that were removed had portrayed vaccination negatively.

**Interpretation:** The majority of the vaccination content depicted on Canadian chiropractic websites negatively portrays vaccination, and national media attention was associated with the removal of almost half of all such online material.

**Word count:** 2,490

## Introduction

With approximately 9,000 practitioners, chiropractic is Canada's 3<sup>rd</sup> largest regulated healthcare profession.<sup>1</sup> Twelve percent of Canadians, largely adults, report attending a chiropractor in the past 12-months, predominantly for conservative management of low back and neck pain.<sup>2,3</sup> The chiropractic profession comprises a range of providers, from evidence-based practitioners who focus on musculoskeletal complaints to traditional practitioners ('vitalists') who maintain historical beliefs that malpositioned spinal vertebrae ('subluxations') interfere with the nervous system, leading to a wide range of complaints and diseases.<sup>4</sup> Historically, chiropractic has been extremely critical of vaccination,<sup>5</sup> and many traditional practitioners maintain these attitudes<sup>6,7</sup>.

A survey of students attending the Canadian Memorial Chiropractic College (CMCC), the only English-language chiropractic college in Canada, found that in the year 2000, only 40% of graduating students endorsed vaccination and 29% were against vaccination in general (31% were unsure).<sup>8</sup> Re-administration of the same survey in the 2011/12 academic year at CMCC found that 83% of graduating students were in favor of vaccines in general;<sup>9</sup> however, the repeat survey suffered from a high non-response rate vs. the original administration (33% vs. 75% of graduating students). A 2002 survey of all 643 licenced chiropractors in Alberta, Canada, (78% response rate) found 27% advised their patients against vaccinating themselves or their children.<sup>10</sup>

The Internet is an important medium for dissemination of both positive and negative vaccination information;<sup>11</sup> however, the general public lacks the necessary skills to distinguish evidence-based resources from those that are not<sup>12</sup>. We reviewed the websites of Canadian chiropractors for content regarding vaccination and, subsequently, explored the impact of media attention on anti-vaccination statements by chiropractors.

## Methods

We followed reporting standards set by the Strengthening the Reporting of Observational Studies in Epidemiology (STROBE) guidelines.<sup>13</sup>

### *Developing a database of Canadian chiropractors*

We generated a database of all licensed Canadian chiropractors in June 2015 by extracting details on every member listed in the regulatory College website for each province.<sup>14-24</sup> For each licensed member, we performed a Google search with variations of their name, clinic name, and location to determine which chiropractors maintained an English-language website.

### *Identifying websites with vaccination content & appraising the quality of information*

From July 2015 to March 2016 we systematically explored each unique website for vaccination content using the websites' search function with the root words vacc\* and immun\*. Pairs of reviewers evaluated all vaccination content independently using the Web Resource Rating Tool (WRRT).<sup>25</sup> This instrument assesses the quality of evidence, transparency, and usability of online health information, and assigns an overall score ranging from 0% to 100%, with higher scores representing better reporting quality, and a WRRT star rating which ranges from 0 (lowest quality) to 5 (highest quality). The same pairs of reviewers classified each website as providing positive, negative, or neutral information regarding vaccination. Any disagreements were resolved by discussion, or by an arbitrator when necessary.

We generated frequencies for all collected data. Categorical data were reported as proportions and continuous data as means and standard deviations if normally distributed and as medians and interquartile ranges (IQRs) if not. We aggregated WRRT scores for websites

1  
2  
3 providing positive and neutral information and used an independent samples Mann-Whitney U  
4  
5 test to explore for differences between scores from websites providing negative portrayals. All  
6  
7 comparisons were 2-tailed, and we set our level of significance at  $p < 0.05$ . We performed all  
8  
9 analyses using IBM SPSS Statistics, version 25.0 (Armonk, NY: IBM Corp).  
10  
11  
12  
13

### 14 *Thematic analysis*

15  
16 We used thematic analysis to synthesize information regarding vaccination provided on  
17  
18 chiropractor's websites into meaningful themes and labeled constructs.<sup>26,27</sup> Pairs of reviewers  
19  
20 used an open coding process to establish the primary categories of information from relevant  
21  
22 material from each website, independently and in duplicate, and then connected the categories to  
23  
24 derive main themes. Any disagreements were resolved by discussion. Based on the codes (labels)  
25  
26 generated from the analysis, pairs of reviewers generated a set of theoretical propositions  
27  
28 (categories), independently and in duplicate, and achieved consensus. Last, four team members  
29  
30 reviewed the results and confirmed the main themes of our study findings. We describe the  
31  
32 results of our thematic analysis using subheadings along with selected illustrative quotes from  
33  
34 website contents.  
35  
36  
37  
38  
39  
40  
41

### 42 *Impact of media attention on website vaccination content*

43  
44 After we had abstracted material on vaccination from chiropractor's websites, there were  
45  
46 multiple national news stories highlighting anti-vaccination statements by some chiropractors,  
47  
48 including some members of regulatory College's.<sup>28-37</sup> In April 2019, we reviewed the same  
49  
50 chiropractor's websites that we had identified to determine any changes following media  
51  
52 coverage.  
53  
54  
55  
56  
57  
58  
59  
60

1  
2  
3  
4  
5 *Ethics consideration*  
6

7  
8 As per the Tri-Council Policy Statement: Ethical Conduct for Research Involving Humans  
9

10 Article 2.2 (a), research is exempt from research ethics board review if it relies exclusively on  
11 publicly available information that is legally accessible to the public and appropriately protected  
12  
13  
14  
15 by law.<sup>38</sup>  
16  
17  
18  
19  
20  
21  
22  
23  
24  
25  
26  
27  
28  
29  
30  
31  
32  
33  
34  
35  
36  
37  
38  
39  
40  
41  
42  
43  
44  
45  
46  
47  
48  
49  
50  
51  
52  
53  
54  
55  
56  
57  
58  
59  
60

Confidential

## Results

We identified 9,131 registered Canadian chiropractors, of which 3,733 (41%) were associated with a publicly available website (Figure 1). Of the 3,733 websites, we found 140 websites (4%) with vaccination content, which reduced to 94 (3%) unique root domain websites (e.g., google.com was the root domain, whereas google.com/images included a directory/path file). The majority (63%, 59 of 94) of chiropractic websites providing information on vaccination were negative in their messaging; 20% (19) were neutral and 17% (16) were positive. (Table 1, Figure 1, Appendix 1) The quality of vaccination content present on chiropractors' websites was generally very poor with a median WRRT score of 19% (IQR 14% to 30%), and did not differ based on whether messaging was negative or not ( $p=0.48$ ). (Table 2)

### *Thematic analysis*

We identified four main themes that emerged from our analysis of chiropractors' website content. (Table 3) Of the 16 positive websites, 15 provided statements that vaccination had been established as effective. Out of the 19 neutral websites, the most common statement (endorsed by 7 websites) was that the public should be provided with the current best evidence regarding vaccination in order to make informed decisions.

#### *I. Alternatives to vaccination*

Twenty-one websites indicated that chiropractic care was an alternative to vaccination. For example: "*People who receive regular chiropractic adjustments have immune system competency that is 200% greater than those who don't.*"

[http://wellingtonchiropracticandwellnessgroup.com/health\\_page.php?page=/dcnewsletter/jan11](http://wellingtonchiropracticandwellnessgroup.com/health_page.php?page=/dcnewsletter/jan11)



1  
2  
3 Another 14 websites suggested that naturopathic remedies could replace vaccination. As noted  
4  
5 on one such site: “*A healthy alternative to the conventional flu shot is a homeopathic natural*  
6  
7 *immune boost shot. Homeopathy works by gently stimulating the body’s innate ability to heal*  
8  
9 *itself and there are virtually no side effects.*” ([http://www.mypurebalance.ca/health-](http://www.mypurebalance.ca/health-programs/natural-immune-boost-for-flu/)  
10  
11 [programs/natural-immune-boost-for-flu/](http://www.mypurebalance.ca/health-programs/natural-immune-boost-for-flu/)) Five websites provided material that promoted  
12  
13 environmental improvements as responsible for falling rates of vaccine-preventable diseases,  
14  
15 instead of vaccines; for example: “*In light of these vital statistics, Palevsky finds it more*  
16  
17 *reasonable to assume that the reason for the reduction in incidence and mortality rates of these*  
18  
19 *diseases was predominantly due to the implementation of other public health strategies,*  
20  
21 *including: clean water, better living conditions, improved sanitation and improved nutrition,*  
22  
23 *than to the introduction of vaccines.*”  
24  
25 ([https://dynamishealthcentre.com/articlesresources/vaccinations/points-of-doubt-regarding-](https://dynamishealthcentre.com/articlesresources/vaccinations/points-of-doubt-regarding-vaccine-efficacy/)  
26  
27 [vaccine-efficacy/](https://dynamishealthcentre.com/articlesresources/vaccinations/points-of-doubt-regarding-vaccine-efficacy/))  
28  
29  
30  
31  
32  
33  
34

## 35 II. Dangers of vaccination

36  
37 Almost all websites negatively portraying vaccination included content that attributed severe side  
38  
39 effects to vaccines (e.g. “*...vaccinations seem to, at least temporarily, increase one type of*  
40  
41 *immunity while decreasing general immunity to many other forms of viruses and other ailments*”;  
42  
43 <http://www.minorchiropractic.com/article/2253.html>), or concluded they caused disease; for  
44  
45 example:  
46  
47  
48  
49  
50

51 “*There is a growing concern that one of the major threats to the development of healthy immune*  
52  
53 *systems has been the increasing emphasis on artificial immunity through vaccines... At the same*  
54  
55  
56  
57

1  
2  
3 *time, rates of asthma, autism, allergies, digestive disorders, autoimmune diseases, cancer, and*  
4 *many other chronic conditions are also rising. Many scientists, chiropractors, medical doctors*  
5 *and parents have become alarmed that this massive volume and combination of inoculations is*  
6 *jeopardizing the long-term health of individuals and future generations.”*  
7  
8  
9

10  
11  
12 (<http://paramountfamilychiropractic.com/hylnet/clientapp/healtharticles.php?id=214>)  
13  
14  
15

16  
17 “A shocking research study published on May 4, 2011, shows a link between the number of  
18 vaccinations given to infants and an increase in infant mortality rate.”  
19  
20

21  
22 (<http://www.focuschiropractic.ca/article/2177.html>)  
23  
24  
25

26 Moreover, 26 websites made claims that vaccines contained toxic components; for example:  
27

28 “The final ingredient in a vaccine is a stabilizer like formaldehyde, a known cancer-causing  
29 agent for which there is no safe allowable limit for your body.”  
30  
31

32  
33 (<http://www.alconachiropractic.ca/hylnet/clientapp/healtharticles.php?id=214>) And, “Joseph  
34 Mercola, M.D., says that many authors have noted a direct correlation between the number of  
35 flu shots and the incidence of Alzheimer’s, attributing to the aluminum and mercury in every flu  
36 shot.” (<http://nrhc.ca/187/the-flu-shot/>)  
37  
38  
39  
40  
41  
42  
43  
44

### 45 III. Evidence regarding vaccination

46  
47 While many chiropractic websites commented on the evidence for vaccination, the majority of  
48 such sites claimed there was evidence of ineffectiveness; for example: “Mass vaccination was  
49 halted in Third World countries because it didn’t work.”  
50  
51  
52  
53  
54  
55  
56  
57

1  
2  
3 (<http://chetday.com/smallpoxepidemic.htm>) Some sites claimed the evidence was biased, or  
4  
5 selectively presented to highlight potential benefits and downplay possible harms: “*Just like all*  
6  
7 *vaccines there are side-effects with the flu shot. The CDC and other organizations would have*  
8  
9 *you overlook them for the supposed benefit of being inoculated against the flu.*”

10  
11  
12 (<http://nrfc.ca/187/the-flu-shot/>) Or, that evidence is conflicting and there is still uncertainty  
13  
14 regarding the harms of vaccination: “*Research linking autism to vaccines is conflicting.*  
15  
16 *Thimerosal, a preservative in vaccines that is 49 percent ethyl mercury, was removed from*  
17  
18 *childhood immunizations in 2001. However, some flu vaccines may still contain thimerosal.*”

19  
20  
21 (<http://www.edwinlauchiropractic.com/newsletters/OHU-2009%2001-12.pdf>)

22  
23  
24 Only 15 websites acknowledged that current evidence was supportive of vaccination, and these  
25  
26 largely highlighted the position statement by the Canadian Chiropractic Association: “*The*  
27  
28 *Canadian Chiropractic Association recognizes that vaccination and immunization are*  
29  
30 *established public health practices in the prevention of infectious diseases.*”

31  
32  
33 (<https://www.physiomed.ca/blog/general-tips/surviving-cold-flu-season/>)

#### 34 35 36 37 38 IV. Health policy regarding vaccination

39  
40 A minority of chiropractic websites provided content regarding vaccination policy, with most  
41  
42 claiming that the dangers of contracting certain vaccine-targeted infections had been over-  
43  
44 exaggerated, as had the effectiveness of some vaccines. The majority of such claims focussed on  
45  
46 influenza (e.g., “*...the flu vaccine may not give the benefits that were previously advertised.*”  
47  
48 <http://www.focuschiropractic.ca/article/1793.html>). Other subthemes were that industry was  
49  
50 active in lobbying for healthcare policy that would benefit them financially: “*A February 11,*  
51  
52 *2007 story appearing in the Washington Post and no less than 72 different news publications has*  
53  
54  
55  
56  
57  
58  
59  
60

1  
2  
3 *exposed the fact that a major drug company, Merck & Co. is behind the large lobbying effort to*  
4 *have 18 states pass laws making their vaccine required for 6th grade girls. If these laws pass,*  
5 *Merck, which last year showed revenues of \$22.6 billion, stands to earn hundreds of millions of*  
6 *dollars.”* (<http://www.robieatspringgardenchiropractic.com/article/1592.html>)  
7  
8  
9  
10  
11

12 Some sites claimed that mandatory vaccination was an infringement on personal liberty  
13 and provided links to the National Vaccine Information Center (NVIC) website: “*As more*  
14 *vaccines have been recommended and mandated by government health officials, NVIC is*  
15 *receiving more reports from Americans describing how they are being harassed for trying to*  
16 *make informed vaccine choices for themselves and their children”*  
17  
18  
19  
20  
21  
22  
23  
24 (<http://www.nvic.org/reporting-systems.aspx>) And that the public should be better educated  
25 about vaccination in order to make informed decisions: “*Vaccinations are a controversial subject*  
26 *and it’s imperative to inform yourself before deciding whether or not to vaccinate yourself or*  
27 *those under your care.”*  
28  
29  
30  
31  
32

33 (<https://dynamishealthcentre.com/articlesresources/vaccinations/>)  
34  
35  
36  
37

### 38 *Impact of media attention on chiropractic website vaccination content*

39

40 Approximately three years after a number of media outlets began exploring anti-vaccination  
41 statements by some chiropractors, almost half of the websites identified in our study (47%; 45 of  
42 94 sites) had been discontinued or all content regarding vaccination had been removed. This  
43 predominantly affected sites that had published information portraying vaccination negatively;  
44 specifically, 33 of 45 (73%) negative websites maintained by chiropractors had been  
45 discontinued or their vaccination content removed. Amongst the 49 websites that were still  
46 active, 53% (26 of 49) provided negative information regarding vaccination. (Appendix 2)  
47  
48  
49  
50  
51  
52  
53  
54  
55  
56  
57  
58  
59  
60

## Interpretation

Close to half of Canada's 9,131 chiropractors maintain a website, 4% of which provided information regarding vaccination, the majority of which was critical. The quality of vaccination information was generally very poor, and common themes were that there are effective alternatives to vaccination, vaccines are dangerous and can cause disease, the evidence is often biased, conflicting, or shows that vaccines are ineffective, and that vaccination should not be mandatory. Following national media attention to anti-vaccination statements by some chiropractors (including members of regulatory Colleges), approximately half of chiropractors' websites providing information on vaccination were discontinued or the information regarding vaccination was removed.

The Canadian Chiropractic Association is supportive of vaccination and has published a statement that vaccination is not within the scope of practice for chiropractors,<sup>39</sup> a position that is supported by four provincial regulatory Colleges. (Appendix 3) However, the history of regulating information on vaccination by chiropractors is complex. In 2004, following media attention on anti-vaccination statements by chiropractors, the College of Chiropractors of Ontario (CCO) approved a Standard of practice (S-015) requiring its members to refrain from discussing vaccination with their patients or the general public. Traditional chiropractors strongly disagreed with this Standard (Appendix 4) and some responded, in part, by seeking and acquiring elected positions on the CCO.<sup>36,40</sup>

The change in leadership at the CCO had two results: (1) the Standard prohibiting chiropractors from discussing vaccination with their patients was not enforced,<sup>36,41</sup> and (2) the Standard (which was incorporated into S-001) was revised on February 8, 2011, to allow chiropractors to provide "balanced" information on vaccination to the public<sup>40</sup>. Similar issues

1  
2  
3 may have affected the British Columbia College of Chiropractors.<sup>42</sup> Following recent media  
4 attention, the CCO Standard (S-001) was amended in 2018 and 2019 to prohibit chiropractors  
5 from “*Providing information on vaccination on a member's website or social media Account*”.<sup>43</sup>  
6  
7 More recently, the CCO has proposed an amendment that would disallow any academic  
8  
9  
10  
11  
12  
13  
14  
15  
16  
17  
18  
19  
20  
21  
22  
23  
24  
25  
26  
27  
28  
29  
30  
31  
32  
33  
34  
35  
36  
37  
38  
39  
40  
41  
42  
43  
44  
45  
46  
47  
48  
49  
50  
51  
52  
53  
54  
55  
56  
57  
58  
59  
60

chiropractor from assuming a leadership position within the CCO,<sup>44</sup> perhaps as a way to guard against competing views. These challenges have resulted in speculation as to whether the chiropractic profession is capable of self-regulation,<sup>45</sup> and some chiropractic opinion-leaders have called for splitting the profession into two factions: evidence-based chiropractors and traditional chiropractors<sup>4</sup>.

The Canadian media has drawn attention to anti-vaccination statements by some chiropractors, and seemingly had a large impact on curbing publication of such online material. While this is laudable, chiropractic regulatory colleges should monitor chiropractors’ websites for misleading information, and enforce their standards of practice. Moreover, it may be helpful for medical and public health associations work with Canadian chiropractic associations to collaborate on promotion of vaccination programs,<sup>46-48</sup> as has been done by the American Public Health Association <sup>49</sup>.

Our study is limited by the dynamic nature of the Internet, where websites can appear, disappear, or be moved to other addresses overnight. Additionally, we only included websites published in English, and therefore our findings may not extend to websites published in other languages. Strengths of our study included a rigorous approach to identify all practicing chiropractors in Canada and any associated websites. Both ratings of the quality of vaccine information, and the overall messaging (i.e., positive, neutral, or negative) were conducted independently and in duplicate by pairs of reviewers to increase reliability.

1  
2  
3 **Conclusion**  
4

5 Although a minority of Canadian chiropractors provide vaccination content on their websites, the  
6 quality of information is often poor and the majority of sites portray vaccination in a negative  
7  
8 manner. National media attention was associated with removal of almost half of all such online  
9  
10 material.  
11  
12  
13  
14  
15  
16  
17  
18  
19  
20  
21  
22  
23  
24  
25  
26  
27  
28  
29  
30  
31  
32  
33  
34  
35  
36  
37  
38  
39  
40  
41  
42  
43  
44  
45  
46  
47  
48  
49  
50  
51  
52  
53  
54  
55  
56  
57  
58  
59  
60

Confidential

1  
2  
3 **Competing interests:** No competing interests were declared.  
4  
5  
6

7  
8 **Contributors:** Each author contributed substantially to the conception and design of the article.  
9

10 Yechan Kim and Adeel Akhtar drafted the initial manuscript. Each author revised the manuscript  
11  
12 critically for important intellectual content, gave final approval of the version to be published  
13  
14 and agreed to be accountable for all aspects of the work.  
15  
16  
17  
18  
19  
20  
21  
22  
23  
24  
25  
26  
27  
28  
29  
30  
31  
32  
33  
34  
35  
36  
37  
38  
39  
40  
41  
42  
43  
44  
45  
46  
47  
48  
49  
50  
51  
52  
53  
54  
55  
56  
57

Confidential



## References

1. CCA Quick Facts. Available: <https://www.chiropractic.ca/media-centre/quick-facts/>. accessed 2019 Nov 8.
2. Beliveau PJH, Wong JJ, Sutton DA, et al. (2017) The chiropractic profession: a scoping review of utilization rates, reasons for seeking care, patient profiles, and care provided. *Chiropr Man Therap* 25: 35.
3. Mior S, Wong J, Sutton D, et al. (2019) Understanding patient profiles and characteristics of current chiropractic practice: a cross-sectional Ontario Chiropractic Observation and Analysis Study (O-COAST). *BMJ Open* 9: e029851.
4. Leboeuf-Yde C, Innes SI, Young KJ, et al. (2019) Chiropractic, one big unhappy family: better together or apart? *Chiropr Man Therap* 27: 4.
5. Campbell JB, Busse JW, Injeyan HS (2000) Chiropractors and vaccination: A historical perspective. *Pediatrics* 105: E43.
6. Busse JW, Morgan L, Campbell JB (2005) Chiropractic antivaccination arguments. *J Manipulative Physiol Ther* 28: 367-73.
7. McGregor M, Puhl AA, Reinhart C, et al. (2014) Differentiating intraprofessional attitudes toward paradigms in health care delivery among chiropractic factions: results from a randomly sampled survey. *BMC Complement Altern Med* 14: 51.
8. Busse JW, Kulkarni AV, Campbell JB, et al. (2002) Attitudes toward vaccination: a survey of Canadian chiropractic students. *CMAJ* 166: 1531-4.
9. Lameris M, Schmidt C, Gleberzon B, et al. (2013) Attitudes toward vaccination: A cross-sectional survey of students at the Canadian Memorial Chiropractic College. *J Can Chiropr Assoc* 57: 214-20.

10. Russell ML, Injeyan HS, Verhoef MJ, et al. (2004) Beliefs and behaviours: understanding chiropractors and immunization. *Vaccine* 23: 372-9.
11. Keelan J, Pavri-Garcia V, Tomlinson G, et al. (2007) YouTube as a source of information on immunization: a content analysis. *JAMA* 298: 2482-4.
12. Eysenbach G, Köhler C (2002) How do consumers search for and appraise health information on the world wide web? Qualitative study using focus groups, usability tests, and in-depth interviews. *BMJ* 324: 573-577
13. von Elm E, Altman DG, Egger M, et al. (2007) The Strengthening the Reporting of Observational Studies in Epidemiology (STROBE) Statement: Guidelines for Reporting Observational Studies. *PLoS Med* 4: e296.
14. Canadian chiropractic association. Find a chiro. Available:  
<https://www.chiropractic.ca/about-chiropractic/find-a-chiro/>. accessed 2019 Nov 8.
15. College of Chiropractors of Ontario. Searchable Online Public Register. Available at:  
<https://onlineservice.cco.on.ca/webs/cco/register/?t=1>. accessed 2019 Nov 8.
16. College of Chiropractors of British Columbia. Find a Chiropractor. Available at:  
<https://registry.chirobc.com/Search/Search?chkAcceptTerms=on>. accessed 2019 Nov 8.
17. Ordre des chiropraticiens du Québec. Find a chiro. Available at:  
<https://www.chiropatique.com/en/find-a-chiropractor/>. accessed 2019 Nov 8.
18. Manitoba chiropractors association. Find a Manitoba chiropractor. Available at:  
<https://manitobachiropractors.ca/find-an-mb-chiropractor/>.  
accessed 2019 Nov 8.
19. Newfoundland and Labrador Chiropractic Association. Find a Chiropractor. Available at:  
<http://nlchiropractic.ca/chiropractors/find-a-chiropractor/>. accessed 2019 Nov 8.

- 1  
2  
3 20. Nova Scotia College of Chiropractors: Find a Chiropractor. Available at:  
4  
5 <https://www.knowyourback.ca/find-a-chiropractor/>. accessed 2019 Nov 8.  
6  
7
- 8 21. Prince Edward Island Chiropractic Association. Find a Chiro. Available at:  
9  
10 <https://www.peichiropractic.ca/>. accessed 2019 Nov 8.  
11  
12
- 13 22. Chiropractors' Association of Saskatchewan. Find a chiropractor. Available at:  
14  
15 <https://saskchiro.ca/find-a-chiropractor/>. accessed 2019 Nov 8.  
16  
17
- 18 23. Alberta College and Association of Chiropractors. Find a chiropractor. Available at:  
19  
20 <https://albertachiro.com/find-a-chiro>. accessed 2019 Nov 8.  
21  
22
- 23 24. New Brunswick Chiropractors Association. Find a Chiropractor. Available at:  
24  
25 <https://nbchiropractic.ca/>. accessed 2019 Nov 8.  
26  
27
- 28 25. Dobbins M, Watson S, Read K, et al. (2018) A Tool That Assesses the Evidence,  
29  
30  
31  
32  
33  
34  
35  
36  
37  
38  
39  
40  
41  
42  
43  
44  
45  
46  
47  
48  
49  
50  
51  
52  
53  
54  
55  
56  
57  
58  
59  
60  
61  
62  
63  
64  
65  
66  
67  
68  
69  
70  
71  
72  
73  
74  
75  
76  
77  
78  
79  
80  
81  
82  
83  
84  
85  
86  
87  
88  
89  
90  
91  
92  
93  
94  
95  
96  
97  
98  
99  
100  
101  
102  
103  
104  
105  
106  
107  
108  
109  
110  
111  
112  
113  
114  
115  
116  
117  
118  
119  
120  
121  
122  
123  
124  
125  
126  
127  
128  
129  
130  
131  
132  
133  
134  
135  
136  
137  
138  
139  
140  
141  
142  
143  
144  
145  
146  
147  
148  
149  
150  
151  
152  
153  
154  
155  
156  
157  
158  
159  
160  
161  
162  
163  
164  
165  
166  
167  
168  
169  
170  
171  
172  
173  
174  
175  
176  
177  
178  
179  
180  
181  
182  
183  
184  
185  
186  
187  
188  
189  
190  
191  
192  
193  
194  
195  
196  
197  
198  
199  
200  
201  
202  
203  
204  
205  
206  
207  
208  
209  
210  
211  
212  
213  
214  
215  
216  
217  
218  
219  
220  
221  
222  
223  
224  
225  
226  
227  
228  
229  
230  
231  
232  
233  
234  
235  
236  
237  
238  
239  
240  
241  
242  
243  
244  
245  
246  
247  
248  
249  
250  
251  
252  
253  
254  
255  
256  
257  
258  
259  
260  
261  
262  
263  
264  
265  
266  
267  
268  
269  
270  
271  
272  
273  
274  
275  
276  
277  
278  
279  
280  
281  
282  
283  
284  
285  
286  
287  
288  
289  
290  
291  
292  
293  
294  
295  
296  
297  
298  
299  
300  
301  
302  
303  
304  
305  
306  
307  
308  
309  
310  
311  
312  
313  
314  
315  
316  
317  
318  
319  
320  
321  
322  
323  
324  
325  
326  
327  
328  
329  
330  
331  
332  
333  
334  
335  
336  
337  
338  
339  
340  
341  
342  
343  
344  
345  
346  
347  
348  
349  
350  
351  
352  
353  
354  
355  
356  
357  
358  
359  
360  
361  
362  
363  
364  
365  
366  
367  
368  
369  
370  
371  
372  
373  
374  
375  
376  
377  
378  
379  
380  
381  
382  
383  
384  
385  
386  
387  
388  
389  
390  
391  
392  
393  
394  
395  
396  
397  
398  
399  
400  
401  
402  
403  
404  
405  
406  
407  
408  
409  
410  
411  
412  
413  
414  
415  
416  
417  
418  
419  
420  
421  
422  
423  
424  
425  
426  
427  
428  
429  
430  
431  
432  
433  
434  
435  
436  
437  
438  
439  
440  
441  
442  
443  
444  
445  
446  
447  
448  
449  
450  
451  
452  
453  
454  
455  
456  
457  
458  
459  
460  
461  
462  
463  
464  
465  
466  
467  
468  
469  
470  
471  
472  
473  
474  
475  
476  
477  
478  
479  
480  
481  
482  
483  
484  
485  
486  
487  
488  
489  
490  
491  
492  
493  
494  
495  
496  
497  
498  
499  
500  
501  
502  
503  
504  
505  
506  
507  
508  
509  
510  
511  
512  
513  
514  
515  
516  
517  
518  
519  
520  
521  
522  
523  
524  
525  
526  
527  
528  
529  
530  
531  
532  
533  
534  
535  
536  
537  
538  
539  
540  
541  
542  
543  
544  
545  
546  
547  
548  
549  
550  
551  
552  
553  
554  
555  
556  
557  
558  
559  
560  
561  
562  
563  
564  
565  
566  
567  
568  
569  
570  
571  
572  
573  
574  
575  
576  
577  
578  
579  
580  
581  
582  
583  
584  
585  
586  
587  
588  
589  
590  
591  
592  
593  
594  
595  
596  
597  
598  
599  
600  
601  
602  
603  
604  
605  
606  
607  
608  
609  
610  
611  
612  
613  
614  
615  
616  
617  
618  
619  
620  
621  
622  
623  
624  
625  
626  
627  
628  
629  
630  
631  
632  
633  
634  
635  
636  
637  
638  
639  
640  
641  
642  
643  
644  
645  
646  
647  
648  
649  
650  
651  
652  
653  
654  
655  
656  
657  
658  
659  
660  
661  
662  
663  
664  
665  
666  
667  
668  
669  
670  
671  
672  
673  
674  
675  
676  
677  
678  
679  
680  
681  
682  
683  
684  
685  
686  
687  
688  
689  
690  
691  
692  
693  
694  
695  
696  
697  
698  
699  
700  
701  
702  
703  
704  
705  
706  
707  
708  
709  
710  
711  
712  
713  
714  
715  
716  
717  
718  
719  
720  
721  
722  
723  
724  
725  
726  
727  
728  
729  
730  
731  
732  
733  
734  
735  
736  
737  
738  
739  
740  
741  
742  
743  
744  
745  
746  
747  
748  
749  
750  
751  
752  
753  
754  
755  
756  
757  
758  
759  
760  
761  
762  
763  
764  
765  
766  
767  
768  
769  
770  
771  
772  
773  
774  
775  
776  
777  
778  
779  
780  
781  
782  
783  
784  
785  
786  
787  
788  
789  
790  
791  
792  
793  
794  
795  
796  
797  
798  
799  
800  
801  
802  
803  
804  
805  
806  
807  
808  
809  
810  
811  
812  
813  
814  
815  
816  
817  
818  
819  
820  
821  
822  
823  
824  
825  
826  
827  
828  
829  
830  
831  
832  
833  
834  
835  
836  
837  
838  
839  
840  
841  
842  
843  
844  
845  
846  
847  
848  
849  
850  
851  
852  
853  
854  
855  
856  
857  
858  
859  
860  
861  
862  
863  
864  
865  
866  
867  
868  
869  
870  
871  
872  
873  
874  
875  
876  
877  
878  
879  
880  
881  
882  
883  
884  
885  
886  
887  
888  
889  
890  
891  
892  
893  
894  
895  
896  
897  
898  
899  
900  
901  
902  
903  
904  
905  
906  
907  
908  
909  
910  
911  
912  
913  
914  
915  
916  
917  
918  
919  
920  
921  
922  
923  
924  
925  
926  
927  
928  
929  
930  
931  
932  
933  
934  
935  
936  
937  
938  
939  
940  
941  
942  
943  
944  
945  
946  
947  
948  
949  
950  
951  
952  
953  
954  
955  
956  
957  
958  
959  
960  
961  
962  
963  
964  
965  
966  
967  
968  
969  
970  
971  
972  
973  
974  
975  
976  
977  
978  
979  
980  
981  
982  
983  
984  
985  
986  
987  
988  
989  
990  
991  
992  
993  
994  
995  
996  
997  
998  
999  
1000
29. Marcoux J, Nicholson K. Too early to say if disciplinary action needed for questionable  
54  
55  
56  
57  
58  
59  
60  
61  
62  
63  
64  
65  
66  
67  
68  
69  
70  
71  
72  
73  
74  
75  
76  
77  
78  
79  
80  
81  
82  
83  
84  
85  
86  
87  
88  
89  
90  
91  
92  
93  
94  
95  
96  
97  
98  
99  
100  
101  
102  
103  
104  
105  
106  
107  
108  
109  
110  
111  
112  
113  
114  
115  
116  
117  
118  
119  
120  
121  
122  
123  
124  
125  
126  
127  
128  
129  
130  
131  
132  
133  
134  
135  
136  
137  
138  
139  
140  
141  
142  
143  
144  
145  
146  
147  
148  
149  
150  
151  
152  
153  
154  
155  
156  
157  
158  
159  
160  
161  
162  
163  
164  
165  
166  
167  
168  
169  
170  
171  
172  
173  
174  
175  
176  
177  
178  
179  
180  
181  
182  
183  
184  
185  
186  
187  
188  
189  
190  
191  
192  
193  
194  
195  
196  
197  
198  
199  
200  
201  
202  
203  
204  
205  
206  
207  
208  
209  
210  
211  
212  
213  
214  
215  
216  
217  
218  
219  
220  
221  
222  
223  
224  
225  
226  
227  
228  
229  
230  
231  
232  
233  
234  
235  
236  
237  
238  
239  
240  
241  
242  
243  
244  
245  
246  
247  
248  
249  
250  
251  
252  
253  
254  
255  
256  
257  
258  
259  
260  
261  
262  
263  
264  
265  
266  
267  
268  
269  
270  
271  
272  
273  
274  
275  
276  
277  
278  
279  
280  
281  
282  
283  
284  
285  
286  
287  
288  
289  
290  
291  
292  
293  
294  
295  
296  
297  
298  
299  
300  
301  
302  
303  
304  
305  
306  
307  
308  
309  
310  
311  
312  
313  
314  
315  
316  
317  
318  
319  
320  
321  
322  
323  
324  
325  
326  
327  
328  
329  
330  
331  
332  
333  
334  
335  
336  
337  
338  
339  
340  
341  
342  
343  
344  
345  
346  
347  
348  
349  
350  
351  
352  
353  
354  
355  
356  
357  
358  
359  
360  
361  
362  
363  
364  
365  
366  
367  
368  
369  
370  
371  
372  
373  
374  
375  
376  
377  
378  
379  
380  
381  
382  
383  
384  
385  
386  
387  
388  
389  
390  
391  
392  
393  
394  
395  
396  
397  
398  
399  
400  
401  
402  
403  
404  
405  
406  
407  
408  
409  
410  
411  
412  
413  
414  
415  
416  
417  
418  
419  
420  
421  
422  
423  
424  
425  
426  
427  
428  
429  
430  
431  
432  
433  
434  
435  
436  
437  
438  
439  
440  
441  
442  
443  
444  
445  
446  
447  
448  
449  
450  
451  
452  
453  
454  
455  
456  
457  
458  
459  
460  
461  
462  
463  
464  
465  
466  
467  
468  
469  
470  
471  
472  
473  
474  
475  
476  
477  
478  
479  
480  
481  
482  
483  
484  
485  
486  
487  
488  
489  
490  
491  
492  
493  
494  
495  
496  
497  
498  
499  
500  
501  
502  
503  
504  
505  
506  
507  
508  
509  
510  
511  
512  
513  
514  
515  
516  
517  
518  
519  
520  
521  
522  
523  
524  
525  
526  
527  
528  
529  
530  
531  
532  
533  
534  
535  
536  
537  
538  
539  
540  
541  
542  
543  
544  
545  
546  
547  
548  
549  
550  
551  
552  
553  
554  
555  
556  
557  
558  
559  
560  
561  
562  
563  
564  
565  
566  
567  
568  
569  
570  
571  
572  
573  
574  
575  
576  
577  
578  
579  
580  
581  
582  
583  
584  
585  
586  
587  
588  
589  
590  
591  
592  
593  
594  
595  
596  
597  
598  
599  
600  
601  
602  
603  
604  
605  
606  
607  
608  
609  
610  
611  
612  
613  
614  
615  
616  
617  
618  
619  
620  
621  
622  
623  
624  
625  
626  
627  
628  
629  
630  
631  
632  
633  
634  
635  
636  
637  
638  
639  
640  
641  
642  
643  
644  
645  
646  
647  
648  
649  
650  
651  
652  
653  
654  
655  
656  
657  
658  
659  
660  
661  
662  
663  
664  
665  
666  
667  
668  
669  
670  
671  
672  
673  
674  
675  
676  
677  
678  
679  
680  
681  
682  
683  
684  
685  
686  
687  
688  
689  
690  
691  
692  
693  
694  
695  
696  
697  
698  
699  
700  
701  
702  
703  
704  
705  
706  
707  
708  
709  
710  
711  
712  
713  
714  
715  
716  
717  
718  
719  
720  
721  
722  
723  
724  
725  
726  
727  
728  
729  
730  
731  
732  
733  
734  
735  
736  
737  
738  
739  
740  
741  
742  
743  
744  
745  
746  
747  
748  
749  
750  
751  
752  
753  
754  
755  
756  
757  
758  
759  
760  
761  
762  
763  
764  
765  
766  
767  
768  
769  
770  
771  
772  
773  
774  
775  
776  
777  
778  
779  
780  
781  
782  
783  
784  
785  
786  
787  
788  
789  
790  
791  
792  
793  
794  
795  
796  
797  
798  
799  
800  
801  
802  
803  
804  
805  
806  
807  
808  
809  
810  
811  
812  
813  
814  
815  
816  
817  
818  
819  
820  
821  
822  
823  
824  
825  
826  
827  
828  
829  
830  
831  
832  
833  
834  
835  
836  
837  
838  
839  
840  
841  
842  
843  
844  
845  
846  
847  
848  
849  
850  
851  
852  
853  
854  
855  
856  
857  
858  
859  
860  
861  
862  
863  
864  
865  
866  
867  
868  
869  
870  
871  
872  
873  
874  
875  
876  
877  
878  
879  
880  
881  
882  
883  
884  
885  
886  
887  
888  
889  
890  
891  
892  
893  
894  
895  
896  
897  
898  
899  
900  
901  
902  
903  
904  
905  
906  
907  
908  
909  
910  
911  
912  
913  
914  
915  
916  
917  
918  
919  
920  
921  
922  
923  
924  
925  
926  
927  
928  
929  
930  
931  
932  
933  
934  
935  
936  
937  
938  
939  
940  
941  
942  
943  
944  
945  
946  
947  
948  
949  
950  
951  
952  
953  
954  
955  
956  
957  
958  
959  
960  
961  
962  
963  
964  
965  
966  
967  
968  
969  
970  
971  
972  
973  
974  
975  
976  
977  
978  
979  
980  
981  
982  
983  
984  
985  
986  
987  
988  
989  
990  
991  
992  
993  
994  
995  
996  
997  
998  
999  
1000

- 1  
2  
3  
4  
5  
6  
7  
8  
9  
10  
11  
12  
13  
14  
15  
16  
17  
18  
19  
20  
21  
22  
23  
24  
25  
26  
27  
28  
29  
30  
31  
32  
33  
34  
35  
36  
37  
38  
39  
40  
41  
42  
43  
44  
45  
46  
47  
48  
49  
50  
51  
52  
53  
54  
55  
56  
57  
58  
59  
60
- <https://www.cbc.ca/news/canada/manitoba/manitoba-chiropractors-association-review-ads-1.4035366>. accessed 2019 Nov 8.
30. Kubinec V-L, Nicholson K. Some chiropractors forced to adjust websites after association cracks down on health messaging. CBC News. January 5, 2018. Available at: <https://www.cbc.ca/news/canada/manitoba/chiropractors-advertising-claims-crackdown-1.4473992>. accessed 2019 Nov 8.
31. Lindsay B. Province directs removal of anti-vaccine posts that broke B.C. rules for chiropractors. CBC News. May 2, 2018. Available at: <https://www.cbc.ca/news/canada/british-columbia/province-directs-removal-of-anti-vaccine-posts-that-broke-b-c-rules-for-chiropractors-1.4645068>. accessed 2019 Nov 8.
32. Doucette K. Regulator investigating Halifax chiropractor's posts on vaccination. The Canadian Press. May 25, 2018. Available at: <https://atlantic.ctvnews.ca/regulator-investigating-halifax-chiropractor-s-posts-on-vaccination-1.3945068>. accessed 2019 Nov 8.
33. Young L. Here's what naturopaths and chiropractors shouldn't be advising you about. Global News. June 2, 2018. Available at: <https://globalnews.ca/news/4248401/naturopath-chiropractor-advice-vaccination/>. accessed 2019 Nov 8.
34. Lindsay B. There's an epidemic of bogus health claims online, and no easy cure: Distrust of institutions fuels medical myths, and social media only reinforces false claims. CBC News. June 9, 2018. Available at: <https://www.cbc.ca/news/canada/british-columbia/there-s-an-epidemic-of-bogus-health-claims-online-and-no-easy-cure-1.4695898>. accessed 2019 Nov 8.

- 1  
2  
3  
4  
5  
6  
7  
8  
9  
10  
11  
12  
13  
14  
15  
16  
17  
18  
19  
20  
21  
22  
23  
24  
25  
26  
27  
28  
29  
30  
31  
32  
33  
34  
35  
36  
37  
38  
39  
40  
41  
42  
43  
44  
45  
46  
47  
48  
49  
50  
51  
52  
53  
54  
55  
56  
57  
58  
59  
60
35. Campbell F. Anti-vaxxing statements lead to Oxford Chiropractors clinic closure. The Chronical Herald. October 19, 2018. Available at: <https://www.thechronicleherald.ca/news/local/anti-vaxxing-statements-lead-to-oxford-chiropractors-clinic-closure-251956/>. accessed 2019 Nov 8.
  36. Benedetti P, MacPhail W. Chiropractors at a crossroads: The fight for evidence-based treatment and a profession's reputation. The Globe & Mail. November 1, 2018. Available at: <https://www.theglobeandmail.com/canada/article-chiropractors-at-a-crossroads-the-fight-for-evidence-based-treatment/>. accessed 2019 Nov 8.
  37. MacPhail W, Benedetti P. Three senior members of the council that regulates Ontario chiropractors have made anti-vaccination statements. The National Post. March 15, 2019. Available at: <https://nationalpost.com/news/college-of-chiropractors-of-ontario-anti-vaccine>. accessed 2019 Nov 8.
  38. Canadian Institutes of Health Research, Natural Sciences and Engineering Research Council of Canada, Social Sciences and Humanities Research Council of Canada. Tri-Council Policy Statement: Ethical conduct for research involving humans. Medical Research Council of Canada. 2014. 1–10 p.
  39. Canadian Chiropractic Association. Code of Ethics: Vaccination and Immunization. Available at: <https://www.chiropractic.ca/about-cca/code-of-ethics/vaccination-immunization/>. accessed 2019 Nov 8.
  40. Gleberzon B, Lameris M, Schmidt C, et al. (2013) On Vaccination & Chiropractic: when ideology, history, perception, politics and jurisprudence collide. *J Can Chiropr Assoc* 57: 205-13.

- 1  
2  
3 41. Mesley W. The Debate over Childhood Vaccination. The National (CBC) on January 26<sup>th</sup>,  
4  
5 2011 at 9:00 pm (ET).  
6  
7  
8 42. Lindsay B. Ministry considered options for handling 'dysfunctional' chiropractors college  
9  
10 after CBC report, FOI shows. CBC News. March 18, 2019. Available at:  
11  
12 [https://www.cbc.ca/news/canada/british-columbia/chiropractor-college-health-ministry-](https://www.cbc.ca/news/canada/british-columbia/chiropractor-college-health-ministry-complaint-vaccination-1.5058659)  
13  
14 [complaint-vaccination-1.5058659](https://www.cbc.ca/news/canada/british-columbia/chiropractor-college-health-ministry-complaint-vaccination-1.5058659). accessed 2019 Nov 8.  
15  
16  
17 43. College of Chiropractors of Ontario. Standard of Practice S-001. Available at:  
18  
19 <https://www.cco.on.ca/wp-content/uploads/2019/06/S-001April302019.pdf>. accessed 2019  
20  
21 Nov 8.  
22  
23  
24 44. Mizel D, President of the College of Chiropractors of Ontario. Clarification to the proposed  
25  
26 amendment to CCO By-law 6. August 23, 2019.  
27  
28  
29 45. Benedetti P, MacPhail W. Calls grow for outside regulation of chiropractors. The Globe &  
30  
31 Mail. December 30, 2018. Available at: [https://www.theglobeandmail.com/canada/article-](https://www.theglobeandmail.com/canada/article-calls-grow-for-outside-regulation-of-chiropractors/)  
32  
33 [calls-grow-for-outside-regulation-of-chiropractors/](https://www.theglobeandmail.com/canada/article-calls-grow-for-outside-regulation-of-chiropractors/). accessed 2019 Nov 8.  
34  
35  
36 46. Busse JW, Wilson K, Campbell JB (2008) Attitudes towards vaccination among  
37  
38 chiropractic and naturopathic students. *Vaccine* 26: 6237-43.  
39  
40  
41 47. McMurtry A, Wilson K, Clarkin C, et al. (2015) The development of vaccination  
42  
43 perspectives among chiropractic, naturopathic and medical students: a case study of  
44  
45 professional enculturation. *Adv Health Sci Educ Theory Pract* 20: 1291-302.  
46  
47  
48 48. Johnson C, Baird R, Dougherty PE, et al. (2008) Chiropractic and public health: current  
49  
50 state and future vision. *J Manipulative Physiol Ther* 31: 397-410.  
51  
52  
53  
54  
55  
56  
57  
58  
59  
60

1  
2  
3 49. American Public Health Association. Chiropractic Health Care. Available at:  
4  
5 <https://www.apha.org/apha-communities/member-sections/chiropractic-health-care>.

6  
7  
8 accessed 2019 Nov 8.  
9  
10  
11  
12  
13  
14  
15  
16  
17  
18  
19  
20  
21  
22  
23  
24  
25  
26  
27  
28  
29  
30  
31  
32  
33  
34  
35  
36  
37  
38  
39  
40  
41  
42  
43  
44  
45  
46  
47  
48  
49  
50  
51  
52  
53  
54  
55  
56  
57  
58  
59  
60

Confidential

**Table 1:** Canadian chiropractors and websites identified

| <b>Province</b>      | <b>No. of chiropractors (%)</b> | <b>No. of chiropractic websites (%)</b> | <b>No. of chiropractic websites with vaccination content</b> |
|----------------------|---------------------------------|-----------------------------------------|--------------------------------------------------------------|
| Ontario              | 5797 (64%)                      | 2812 (69%)                              | 106                                                          |
| British Columbia     | 803 (9%)                        | 285 (7%)                                | 7                                                            |
| Quebec               | 1003 (17%)                      | 373 (9%)                                | 3                                                            |
| Manitoba             | 319 (4%)                        | 132 (3%)                                | 9                                                            |
| Newfoundland         | 65 (1%)                         | 26 (1%)                                 | 2                                                            |
| Nova Scotia          | 148 (2%)                        | 76 (2%)                                 | 4                                                            |
| Prince Edward Island | 7 (0.1%)                        | 5 (0.1%)                                | 0                                                            |
| Saskatchewan         | 184 (2%)                        | 41 (1%)                                 | 0                                                            |
| Alberta              | 726 (8%)                        | 302 (7%)                                | 5                                                            |
| New Brunswick        | 79 (1%)                         | 32 (1%)                                 | 7                                                            |
| <b>Total</b>         | <b>9131</b>                     | <b>4084</b>                             | <b>143</b>                                                   |



**Table 2:** Quality of vaccination content reporting among unique

|                                      | Positive messaging<br>(n=16) | Neutral messaging<br>(n=19) | Negative messaging<br>(n=59) |
|--------------------------------------|------------------------------|-----------------------------|------------------------------|
| WRRT score (0-100%),<br>median (IQR) | 17.9% (11.6 – 18.9)          | 22.3% (14.3 – 39.3)         | 20.5 (14.3 – 32.4)           |
| WRRT star score, n (%)               |                              |                             |                              |
| 0 (lowest quality)                   | 14 (88%)                     | 13 (68%)                    | 4 (7%)                       |
| 1                                    | 1 (6%)                       | 5 (26%)                     | 34 (58%)                     |
| 2                                    | 1 (6%)                       | 1 (5%)                      | 11 (19%)                     |
| 3                                    | 0                            | 0                           | 9 (15%)                      |
| 4                                    | 0                            | 0                           | 1 (2%)                       |
| 5 (highest quality)                  | 0                            | 0                           | 0                            |

WRRT: Web Resource Rating Tool

Confidential

**Table 3:** Themes and sub-themes of vaccination content from chiropractor's websites

| Theme                                                                                                   | Sub-themes                                                                                               | Frequency of endorsement                                                                   |
|---------------------------------------------------------------------------------------------------------|----------------------------------------------------------------------------------------------------------|--------------------------------------------------------------------------------------------|
| 1. There are effective alternatives to vaccination                                                      | chiropractic can boost immunity                                                                          | 21                                                                                         |
|                                                                                                         | naturopathy can boost immunity                                                                           | 14                                                                                         |
|                                                                                                         | better living conditions, improved sanitation and improved nutrition are more effective than vaccination | 5                                                                                          |
| 2. Vaccines are dangerous                                                                               | cause severe side effects                                                                                | 51                                                                                         |
|                                                                                                         | have toxic components (e.g. mercury)                                                                     | 26                                                                                         |
|                                                                                                         | compromise immunity                                                                                      | 22                                                                                         |
|                                                                                                         | cause autism                                                                                             | 14                                                                                         |
|                                                                                                         | increase rates of various chronic diseases                                                               | 13                                                                                         |
|                                                                                                         | cause Guillain-Barré syndrome                                                                            | 9                                                                                          |
|                                                                                                         | cause allergies                                                                                          | 8                                                                                          |
|                                                                                                         | cause sudden infant death syndrome                                                                       | 5                                                                                          |
|                                                                                                         | cause asthma                                                                                             | 5                                                                                          |
|                                                                                                         | increase risk of cancer                                                                                  | 4                                                                                          |
|                                                                                                         | cause diabetes                                                                                           | 3                                                                                          |
|                                                                                                         | cause attention deficit hyperactivity disorder                                                           | 2                                                                                          |
|                                                                                                         | cause Crohn's disease                                                                                    | 2                                                                                          |
|                                                                                                         | cause Shingles                                                                                           | 2                                                                                          |
| increase risk of Alzheimer's disease                                                                    | 2                                                                                                        |                                                                                            |
| 3. Evidence regarding vaccination                                                                       | cause ear infections                                                                                     | 1                                                                                          |
|                                                                                                         | there is insufficient evidence to support vaccination                                                    | 51                                                                                         |
|                                                                                                         | the evidence in favor of vaccination is poor quality and/or biased                                       | 20                                                                                         |
|                                                                                                         | the evidence supports vaccination as effective                                                           | 15                                                                                         |
|                                                                                                         | the evidence for vaccination is conflicting                                                              | 7                                                                                          |
|                                                                                                         | anecdotal evidence suggests that the harms of vaccination outweigh the benefits                          | 2                                                                                          |
|                                                                                                         | 4. Health policy regarding vaccination                                                                   | dangers of vaccine-targeted diseases are overblown by public health agencies and the media |
| vaccines should not be mandatory                                                                        |                                                                                                          | 15                                                                                         |
| the Centres of Disease Control and Prevention has important conflicts of interest regarding vaccination |                                                                                                          | 11                                                                                         |
| the public should be better educated about vaccination                                                  |                                                                                                          | 7                                                                                          |

**Figure 1:** A flow diagram of Canadian chiropractors' websites with vaccination content

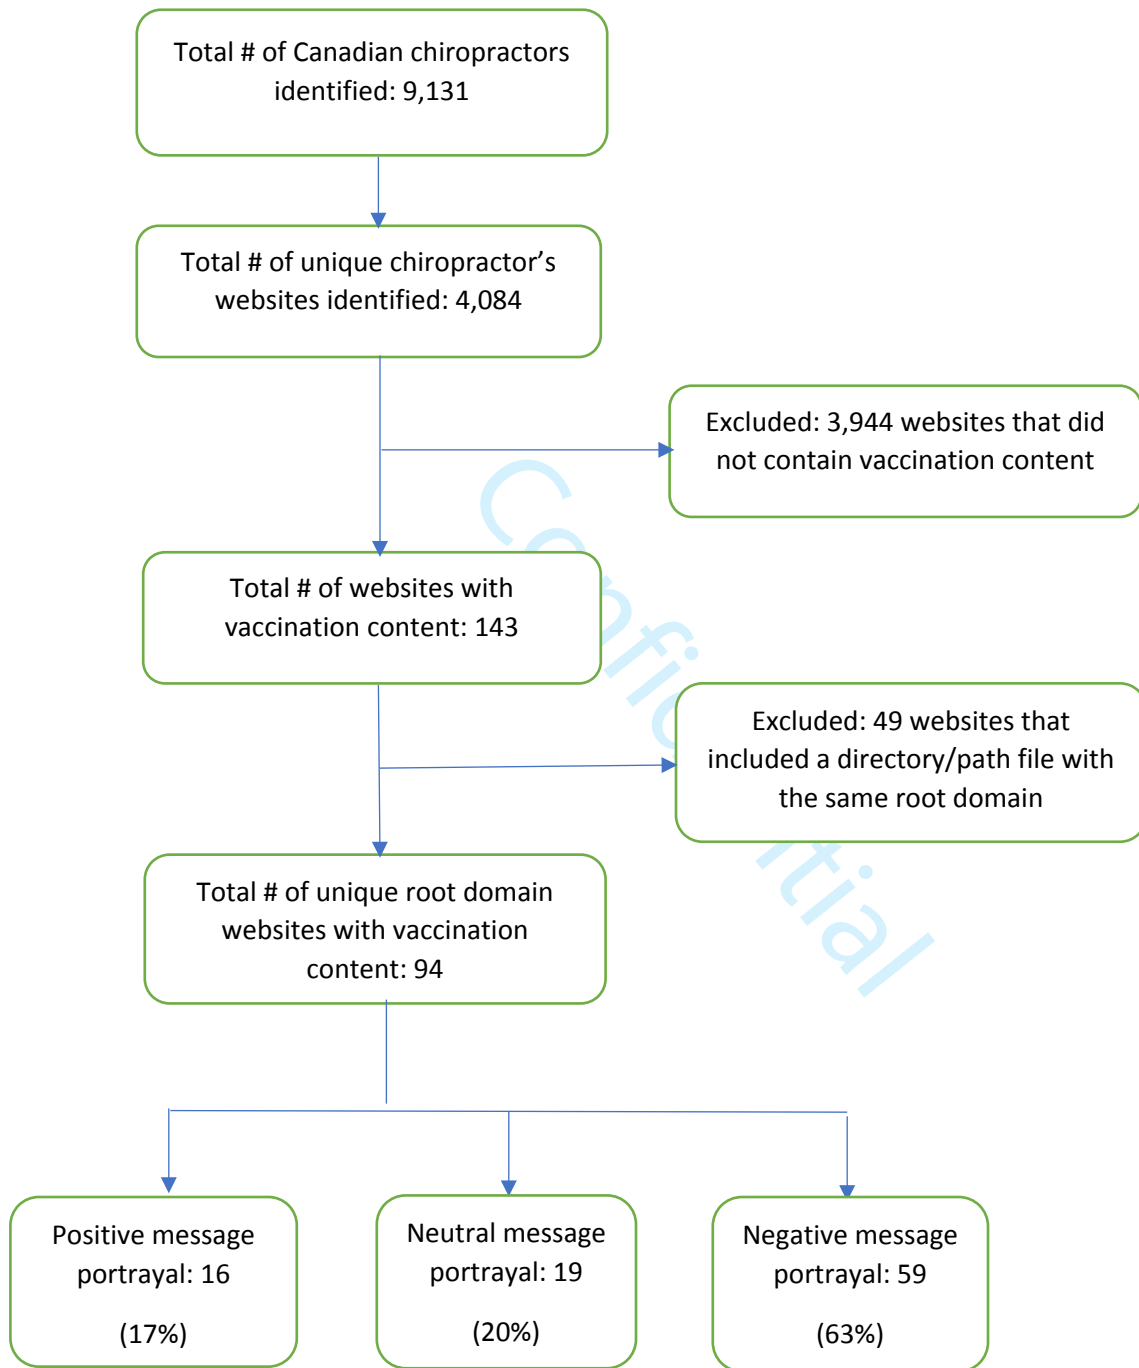

**Appendix 1: Chiropractic websites identified with content regarding vaccination**

| No.     | Unique primary website                                                                                                                                                                                                                | Message portrayal | WRRT total score (0-100%) | WRRT star rating (0-5) |
|---------|---------------------------------------------------------------------------------------------------------------------------------------------------------------------------------------------------------------------------------------|-------------------|---------------------------|------------------------|
| Ontario |                                                                                                                                                                                                                                       |                   |                           |                        |
| 1       | <a href="http://amlingerfamilychiropractic.com/health_page.php?page=/dcnewsletter/march13">http://amlingerfamilychiropractic.com/health_page.php?page=/dcnewsletter/march13</a>                                                       | negative          | 14.3                      | 1                      |
| 2       | <a href="http://bosnarhealth.com/?page_id=69">http://bosnarhealth.com/?page_id=69</a>                                                                                                                                                 | negative          | 35.7                      | 2                      |
| 3       | <a href="http://cdn2.perfectpatients.com/childsites/uploads/1117/files/hpv-report-2014.pdf">http://cdn2.perfectpatients.com/childsites/uploads/1117/files/hpv-report-2014.pdf</a>                                                     | negative          | 39.3                      | 2                      |
| 4       | <a href="http://circle-of-life.ca/?p=58">http://circle-of-life.ca/?p=58</a>                                                                                                                                                           | negative          | 26.8                      | 1                      |
| 5       | <a href="http://divinespine.ca/blog/flu-shot-fallacies/">http://divinespine.ca/blog/flu-shot-fallacies/</a>                                                                                                                           | negative          | 7.1                       | 0                      |
| 6       | <a href="http://docferguson.com/frequently-asked-questions/">http://docferguson.com/frequently-asked-questions/</a>                                                                                                                   | negative          | 17.9                      | 1                      |
| 7       | <a href="http://drbenkim.com/">http://drbenkim.com/</a>                                                                                                                                                                               | negative          | 26.8                      | 1                      |
| 8       | <a href="http://drdgroleau.com/2014/08/29/vaccinations-not-mandatory-for-ontario-students/comment-page-1/#comment-20">http://drdgroleau.com/2014/08/29/vaccinations-not-mandatory-for-ontario-students/comment-page-1/#comment-20</a> | negative          | 23.2                      | 1                      |
| 9       | <a href="http://drdianemeyer.com/">http://drdianemeyer.com/</a>                                                                                                                                                                       | negative          | 62.5                      | 3                      |
| 10      | <a href="http://hamiltonchiro.ca/">http://hamiltonchiro.ca/</a>                                                                                                                                                                       | negative          | 60.7                      | 3                      |
| 11      | <a href="http://hopechiropractic.ca/why-chiropractic/chiropractic-research/ear-infections/">http://hopechiropractic.ca/why-chiropractic/chiropractic-research/ear-infections/</a>                                                     | negative          | 14.3                      | 1                      |
| 12      | <a href="http://innerbalancechiropractic.ca/">http://innerbalancechiropractic.ca/</a>                                                                                                                                                 | negative          | 26.8                      | 1                      |
| 13      | <a href="http://nrfc.ca/187/the-flu-shot/">http://nrfc.ca/187/the-flu-shot/</a>                                                                                                                                                       | negative          | 14.3                      | 1                      |
| 14      | <a href="http://optimumwellnesscentres.com/april-8-2011-chronic-fatigue/">http://optimumwellnesscentres.com/april-8-2011-chronic-fatigue/</a>                                                                                         | negative          | 19.8                      | 1                      |
| 15      | <a href="http://p3health.net/?s=vaccin">http://p3health.net/?s=vaccin</a>                                                                                                                                                             | negative          | 35.3                      | 3                      |
| 16      | <a href="http://paramountfamilychiropractic.com/">http://paramountfamilychiropractic.com/</a>                                                                                                                                         | negative          | 62.5                      | 3                      |
| 17      | <a href="http://pikechiropractic.com/blog/flu-shot-hoax">http://pikechiropractic.com/blog/flu-shot-hoax</a>                                                                                                                           | negative          | 32.4                      | 2                      |
| 18      | <a href="http://stallaertchiropractic.com/blog/13/118/4-Tips-to-Stay-HEALTHY-This-Flu-Season.html">http://stallaertchiropractic.com/blog/13/118/4-Tips-to-Stay-HEALTHY-This-Flu-Season.html</a>                                       | negative          | 7.1                       | 0                      |
| 19      | <a href="http://thechiropracticphilanthropist.com/191-dr-nancy-tarlow-the-vaccination-conversation/">http://thechiropracticphilanthropist.com/191-dr-nancy-tarlow-the-vaccination-conversation/</a>                                   | negative          | 17.9                      | 1                      |
| 20      | <a href="http://wellingtonchiropracticandwellnessgroup.com/">http://wellingtonchiropracticandwellnessgroup.com/</a>                                                                                                                   | negative          | 34.8                      | 3                      |
| 21      | <a href="http://www.adiochiropractic.net/">http://www.adiochiropractic.net/</a>                                                                                                                                                       | negative          | 42.9                      | 2                      |
| 22      | <a href="http://www.alconachiropractic.ca/">http://www.alconachiropractic.ca/</a>                                                                                                                                                     | negative          | 14.3                      | 1                      |
| 23      | <a href="http://www.alliancechiroandwellness.com/Newsletters/AllianceIssue37.pdf">http://www.alliancechiroandwellness.com/Newsletters/AllianceIssue37.pdf</a>                                                                         | negative          | 23.2                      | 2                      |

|    |                                                                                                                                                                                             |          |      |   |
|----|---------------------------------------------------------------------------------------------------------------------------------------------------------------------------------------------|----------|------|---|
| 24 | <a href="http://www.axischiropractic.com/Family%20Care/Family%20Care.html">http://www.axischiropractic.com/Family%20Care/Family%20Care.html</a>                                             | negative | 24.1 | 2 |
| 25 | <a href="http://www.chiropracticgeneration.com/">http://www.chiropracticgeneration.com/</a>                                                                                                 | negative | 45.2 | 3 |
| 26 | <a href="http://www.cornerstonehealth.ca/naturopathy/h1n1-hysteria/">http://www.cornerstonehealth.ca/naturopathy/h1n1-hysteria/</a>                                                         | negative | 26.8 | 1 |
| 27 | <a href="http://www.drbarryyoung.com/">http://www.drbarryyoung.com/</a>                                                                                                                     | negative | 10.7 | 1 |
| 28 | <a href="http://www.drvalliant.com/">http://www.drvalliant.com/</a>                                                                                                                         | negative | 42.9 | 3 |
| 29 | <a href="http://www.haltonchiropractor.com/articles/article-flu-shot/">http://www.haltonchiropractor.com/articles/article-flu-shot/</a>                                                     | negative | 16.1 | 1 |
| 30 | <a href="http://www.kawarthalakeschiropracticblog.com/613/fibromyalgia-facts/">http://www.kawarthalakeschiropracticblog.com/613/fibromyalgia-facts/</a>                                     | negative | 14.8 | 1 |
| 31 | <a href="http://www.livewellchiro.ca/index.php?p=439641&amp;s=245&amp;articleid=216">http://www.livewellchiro.ca/index.php?p=439641&amp;s=245&amp;articleid=216</a>                         | negative | 58.9 | 3 |
| 32 | <a href="http://www.mainfamilychiro.com/articles/Flu+Colds/">http://www.mainfamilychiro.com/articles/Flu+Colds/</a>                                                                         | negative | 7.1  | 0 |
| 33 | <a href="http://www.mypurebalance.ca/">http://www.mypurebalance.ca/</a>                                                                                                                     | negative | 10.7 | 1 |
| 34 | <a href="http://www.oakvilleuptownchiropractor.ca/natural-health-information/shot-in-the-dark/">http://www.oakvilleuptownchiropractor.ca/natural-health-information/shot-in-the-dark/</a>   | negative | 20.5 | 1 |
| 35 | <a href="http://www.optimumwellnessclinic.ca/">http://www.optimumwellnessclinic.ca/</a>                                                                                                     | negative | 23.8 | 2 |
| 36 | <a href="http://www.phoenixhealth.me/add-and-adhd/">http://www.phoenixhealth.me/add-and-adhd/</a>                                                                                           | negative | 26.8 | 2 |
| 37 | <a href="http://www.spinewise.ca/the-natural-way-to-maximize-your-childs-health/">http://www.spinewise.ca/the-natural-way-to-maximize-your-childs-health/</a>                               | negative | 17.9 | 1 |
| 38 | <a href="http://www.thenaturalwayclinic.com/">http://www.thenaturalwayclinic.com/</a>                                                                                                       | negative | 9.8  | 0 |
| 39 | <a href="http://www.wellnessfirst.ca/Articles/E26-%20Death%20by%20Vaccines.doc">http://www.wellnessfirst.ca/Articles/E26-%20Death%20by%20Vaccines.doc</a>                                   | negative | 14.3 | 1 |
| 40 | <a href="http://www.woodbridgechiropractor.ca/articles/Flu+Colds/">http://www.woodbridgechiropractor.ca/articles/Flu+Colds/</a>                                                             | negative | 20.5 | 1 |
| 41 | <a href="http://yournewlifenow.blogspot.ca/">http://yournewlifenow.blogspot.ca/</a>                                                                                                         | negative | 16.1 | 1 |
| 42 | <a href="http://www.nvic.org/reporting-systems.aspx">http://www.nvic.org/reporting-systems.aspx</a>                                                                                         | negative | 12.5 | 1 |
| 43 | <a href="http://lifechiropracticcentre.ca/chiropractic-care/measles-and-vaccination-information">http://lifechiropracticcentre.ca/chiropractic-care/measles-and-vaccination-information</a> | neutral  | 14.3 | 1 |
| 44 | <a href="http://maximizedhealth.ca/chiropractic-benefits/boost-your-immunity-naturally/">http://maximizedhealth.ca/chiropractic-benefits/boost-your-immunity-naturally/</a>                 | neutral  | 14.3 | 1 |
| 45 | <a href="http://summitnaturalhealth.ca/">http://summitnaturalhealth.ca/</a>                                                                                                                 | neutral  | 42.9 | 2 |
| 46 | <a href="http://www.chiro-docs.com/index.php?p=415709&amp;s=245&amp;articleid=2385">http://www.chiro-docs.com/index.php?p=415709&amp;s=245&amp;articleid=2385</a>                           | neutral  | 55.4 | 3 |
| 47 | <a href="http://www.kihclinic.com/articles/the-h1n1-vaccine">http://www.kihclinic.com/articles/the-h1n1-vaccine</a>                                                                         | neutral  | 16.1 | 1 |
| 48 | <a href="http://www.lakeshorechiropractic.com/index.php?p=65615&amp;s=245&amp;articleid=2385">http://www.lakeshorechiropractic.com/index.php?p=65615&amp;s=245&amp;articleid=2385</a>       | neutral  | 42.9 | 2 |

|    |                                                                                                                                                                                                                                                   |          |      |   |
|----|---------------------------------------------------------------------------------------------------------------------------------------------------------------------------------------------------------------------------------------------------|----------|------|---|
| 49 | <a href="http://www.meridianspineandsport.ca/?s=vaccin">http://www.meridianspineandsport.ca/?s=vaccin</a>                                                                                                                                         | neutral  | 17.9 | 1 |
| 50 | <a href="http://www.pinewoodhealth.ca/blog/general-category/dont-want-the-flu-shot/">http://www.pinewoodhealth.ca/blog/general-category/dont-want-the-flu-shot/</a>                                                                               | neutral  | 12.5 | 1 |
| 51 | <a href="http://www.thetorontochiropractor.com/index.php?p=407212&amp;s=245&amp;articleid=2385">http://www.thetorontochiropractor.com/index.php?p=407212&amp;s=245&amp;articleid=2385</a>                                                         | neutral  | 17.9 | 1 |
| 52 | <a href="http://globalnews.ca/news/1804162/canadian-study-finds-flu-shot-could-increase-risk-of-getting-sick/">http://globalnews.ca/news/1804162/canadian-study-finds-flu-shot-could-increase-risk-of-getting-sick/</a>                           | neutral  | 28.6 | 1 |
| 53 | <a href="http://www.kcnh.ca/docs/Cold-Flu-Prevention-Treatment.pdf">http://www.kcnh.ca/docs/Cold-Flu-Prevention-Treatment.pdf</a>                                                                                                                 | neutral  | 42.9 | 2 |
| 54 | <a href="http://advancedhealth.ca/conditions/infant-child-and-adolescent-health-concerns/vaccination-and-immunization.html">http://advancedhealth.ca/conditions/infant-child-and-adolescent-health-concerns/vaccination-and-immunization.html</a> | positive | 22.3 | 1 |
| 55 | <a href="http://advancedhealthrecovery.ca/12-way-to-have-a-healthy-holiday-season/">http://advancedhealthrecovery.ca/12-way-to-have-a-healthy-holiday-season/</a>                                                                                 | positive | 39.3 | 2 |
| 56 | <a href="http://applecreeksportsmedicine.com/july-28th-is-world-hepatitis-day/">http://applecreeksportsmedicine.com/july-28th-is-world-hepatitis-day/</a>                                                                                         | positive | 30.4 | 2 |
| 57 | <a href="http://windsormedicalclinic.com/portfolio_posts/vaccines/">http://windsormedicalclinic.com/portfolio_posts/vaccines/</a>                                                                                                                 | positive | 48.2 | 2 |
| 58 | <a href="http://www.abbeymed.ca/abbeyupdates.html">http://www.abbeymed.ca/abbeyupdates.html</a>                                                                                                                                                   | positive | 17.9 | 1 |
| 59 | <a href="http://www.adelaideclinic.com/Living-Well/so-youre-pregnantwhat-now-519167">http://www.adelaideclinic.com/Living-Well/so-youre-pregnantwhat-now-519167</a>                                                                               | positive | 17.9 | 1 |
| 60 | <a href="http://www.belmarrahealth.com/">http://www.belmarrahealth.com/</a>                                                                                                                                                                       | positive | 34.8 | 2 |
| 61 | <a href="http://www.hazeldeanchiropractic.com/how-i-read-a-news-article/">http://www.hazeldeanchiropractic.com/how-i-read-a-news-article/</a>                                                                                                     | positive | 14.3 | 1 |
| 62 | <a href="http://www.physiomed.ca/blog/general-tips/surviving-cold-flu-season/">http://www.physiomed.ca/blog/general-tips/surviving-cold-flu-season/</a>                                                                                           | positive | 10.7 | 1 |
| 63 | <a href="http://www.sportmedicineclinic.com/Living-Well/so-youre-pregnantwhat-now-519163">http://www.sportmedicineclinic.com/Living-Well/so-youre-pregnantwhat-now-519163</a>                                                                     | positive | 23.2 | 1 |
| 64 | <a href="http://www.torontoathleticclub.com/living-well/so-youre-pregnantwhat-now-519161">http://www.torontoathleticclub.com/living-well/so-youre-pregnantwhat-now-519161</a>                                                                     | positive | 10.7 | 1 |
| 65 | <a href="http://www.waterloowellingtonlh.in.on.ca/en/newsandstories/current_news/20141023fluupdate.aspx">http://www.waterloowellingtonlh.in.on.ca/en/newsandstories/current_news/20141023fluupdate.aspx</a>                                       | positive | 17.9 | 1 |
| 66 | <a href="https://www.brightalmond.com/clinical-focus/infectious-disease/">https://www.brightalmond.com/clinical-focus/infectious-disease/</a>                                                                                                     | positive | 32.4 | 3 |
| 67 | <a href="https://www.facebook.com/permalink.php?story_fbid=222612737804579&amp;id=195816277123383">https://www.facebook.com/permalink.php?story_fbid=222612737804579&amp;id=195816277123383</a>                                                   | neutral  | 10.7 | 1 |
| 68 | <a href="http://www.chiropractic.ca/about-cca/code-of-ethics/vaccination-immunization/">http://www.chiropractic.ca/about-cca/code-of-ethics/vaccination-immunization/</a>                                                                         | positive | 17.9 | 1 |

|                         |                                                                                                                                                                                                                                                   |          |      |   |
|-------------------------|---------------------------------------------------------------------------------------------------------------------------------------------------------------------------------------------------------------------------------------------------|----------|------|---|
| 69                      | <a href="http://www.huffingtonpost.ca/michael-kruse/chiropractors-vaccination-debate_b_3280713.html">http://www.huffingtonpost.ca/michael-kruse/chiropractors-vaccination-debate_b_3280713.html</a>                                               | positive | 17.9 | 1 |
| 70                      | <a href="http://www.ncbi.nlm.nih.gov/pmc/articles/PMC3743646/">http://www.ncbi.nlm.nih.gov/pmc/articles/PMC3743646/</a>                                                                                                                           | positive | 8.9  | 1 |
| <b>British Columbia</b> |                                                                                                                                                                                                                                                   |          |      |   |
| 71                      | <a href="http://www.minoruchiropractic.com/articles/vaccination/">http://www.minoruchiropractic.com/articles/vaccination/</a>                                                                                                                     | negative | 25.4 | 1 |
| 72                      | <a href="http://www.sumasmtnchiropractic.com/index.php?search=vacc&amp;p=240601&amp;Submit=Search">http://www.sumasmtnchiropractic.com/index.php?search=vacc&amp;p=240601&amp;Submit=Search</a>                                                   | negative | 26.8 | 1 |
| 73                      | <a href="http://www.edwinlauchiropractic.com/newsletters/OHU-2009%2001-12.pdf">http://www.edwinlauchiropractic.com/newsletters/OHU-2009%2001-12.pdf</a>                                                                                           | negative | 30.4 | 2 |
| 74                      | <a href="http://www.focuschiropractic.ca/articles/vaccination/">http://www.focuschiropractic.ca/articles/vaccination/</a>                                                                                                                         | neutral  | 25.4 | 1 |
| 75                      | <a href="http://nswellness.ca/cold-and-flu-prevention/">http://nswellness.ca/cold-and-flu-prevention/</a>                                                                                                                                         | neutral  | 10.7 | 1 |
| 76                      | <a href="http://www.metrochiro.com/articles/vaccination/">http://www.metrochiro.com/articles/vaccination/</a>                                                                                                                                     | neutral  | 25.4 | 1 |
| <b>Alberta</b>          |                                                                                                                                                                                                                                                   |          |      |   |
| 77                      | <a href="https://www.naturmend.com/blog/2013/01/30/jan-30-the-flu-is-finally-retreating/">https://www.naturmend.com/blog/2013/01/30/jan-30-the-flu-is-finally-retreating/</a>                                                                     | negative | 17.9 | 1 |
| 78                      | <a href="http://www.calgaryspineandsport.com/">www.calgaryspineandsport.com/</a>                                                                                                                                                                  | negative | 13.3 | 1 |
| 79                      | <a href="http://corechiropracticandwellness.com/Vaccines">http://corechiropracticandwellness.com/Vaccines</a>                                                                                                                                     | negative | 14.3 | 1 |
| 80                      | <a href="http://www.gatewaychiropractic.ca/">www.gatewaychiropractic.ca/</a>                                                                                                                                                                      | neutral  | 14.3 | 1 |
| <b>Manitoba</b>         |                                                                                                                                                                                                                                                   |          |      |   |
| 81                      | <a href="http://entertogetwell.ca/chiropractic-care-for-kids/">http://entertogetwell.ca/chiropractic-care-for-kids/</a>                                                                                                                           | negative | 17.9 | 1 |
| 82                      | <a href="http://www.krampchiropractic.com/">http://www.krampchiropractic.com/</a>                                                                                                                                                                 | neutral  | 13.3 | 1 |
| 83                      | <a href="http://www.loewenchiropracticclinic.com/">http://www.loewenchiropracticclinic.com/</a>                                                                                                                                                   | neutral  | 11.5 | 1 |
| <b>New Brunswick</b>    |                                                                                                                                                                                                                                                   |          |      |   |
| 84                      | <a href="http://www.chiroplusdieppe.ca/pregnancy-and-children">http://www.chiroplusdieppe.ca/pregnancy-and-children</a>                                                                                                                           | negative | 28.6 | 1 |
| 85                      | <a href="http://rothesaychiropractic.ca/?s=vaccin">http://rothesaychiropractic.ca/?s=vaccin</a>                                                                                                                                                   | negative | 10.7 | 1 |
| 86                      | <a href="http://www.frederictonchiropractors.com/community-links">http://www.frederictonchiropractors.com/community-links</a>                                                                                                                     | negative | 69.6 | 4 |
| <b>Newfoundland</b>     |                                                                                                                                                                                                                                                   |          |      |   |
| 87                      | <a href="http://dynamishealthcentre.com/">http://dynamishealthcentre.com/</a>                                                                                                                                                                     | negative | 24.6 | 2 |
| 88                      | <a href="http://www.drburton.com/dr-burton-blog">http://www.drburton.com/dr-burton-blog</a>                                                                                                                                                       | negative | 14.3 | 1 |
| <b>Nova Scotia</b>      |                                                                                                                                                                                                                                                   |          |      |   |
| 89                      | <a href="http://atlantic.ctvnews.ca/vaccination-debate-why-some-parents-are-choosing-not-to-vaccinate-their-kids-1.1796563">http://atlantic.ctvnews.ca/vaccination-debate-why-some-parents-are-choosing-not-to-vaccinate-their-kids-1.1796563</a> | negative | 14.3 | 1 |
| 90                      | <a href="http://www.pillarsofhealth.ca/?s=vaccin">http://www.pillarsofhealth.ca/?s=vaccin</a>                                                                                                                                                     | neutral  | 64.3 | 3 |

|        |                                                                                                                                                 |          |      |   |
|--------|-------------------------------------------------------------------------------------------------------------------------------------------------|----------|------|---|
| 91     | <a href="http://www.robieatspringgardenchiropractic.com/articles/vaccine/">http://www.robieatspringgardenchiropractic.com/articles/vaccine/</a> | neutral  | 19.5 | 1 |
| Quebec |                                                                                                                                                 |          |      |   |
| 92     | <a href="http://chiropratiquessante.com/revue-trimestriell/">http://chiropratiquessante.com/revue-trimestriell/</a>                             | positive | 19.2 | 1 |
| 93     | <a href="http://www.triade.ca/index.pl/liens">http://www.triade.ca/index.pl/liens</a>                                                           | positive | 17.9 | 1 |
| 94     | <a href="http://www.sourcdevitalite.com/conference-sur-la-vaccination">http://www.sourcdevitalite.com/conference-sur-la-vaccination</a>         | positive | 16.1 | 1 |

WRT: Web Resource Rating Tool

Confidential



**Appendix 2:** Change in chiropractor's websites with vaccination content from 2016 to 2019

| Province         | Active in 2019 |         |          | Inactive or vaccination content removed in 2019 |         |          |
|------------------|----------------|---------|----------|-------------------------------------------------|---------|----------|
|                  | positive       | neutral | negative | positive                                        | neutral | negative |
| Ontario          | 12             | 8       | 21       | 4                                               | 4       | 21       |
| British Columbia |                |         |          |                                                 | 2       | 4        |
| Alberta          |                |         | 1        |                                                 | 1       | 2        |
| Manitoba         |                |         |          |                                                 | 1       | 2        |
| New Brunswick    |                | 2       | 1        |                                                 |         |          |
| Newfoundland     |                |         | 1        |                                                 |         | 1        |
| Nova Scotia      |                |         | 2        |                                                 |         | 1        |
| Quebec           |                | 1       |          |                                                 |         | 2        |
| <b>Total</b>     | 12             | 11      | 26       | 4                                               | 8       | 33       |

positive, neutral, and negative = websites that provided positive, neutral or negative information regarding vaccination

1  
2  
3 **Appendix 3: Position statements of Canadian chiropractic associations regarding**  
4 **vaccination (accessed 15 June 2015)**  
5  
6  
7

8 **Canadian Chiropractic Association:**  
9

10 “The Canadian Chiropractic Association recognizes that vaccination and immunization are  
11 established public health practices in the prevention of infectious diseases. Vaccination is not  
12 within the scope of chiropractic practice. The appropriate sources for patient consultation and  
13 education regarding vaccination and immunization are public health authorities and health  
14 professionals with a scope of practice that includes vaccination.”  
15

16  
17 <https://www.chiropractic.ca/about-cca/code-of-ethics/vaccination-immunization/>  
18  
19  
20

21 **Manitoba:**  
22

23 “The Manitoba Chiropractors Association (MCA) is a proponent of preventative healthcare and  
24 recognizes that vaccination and immunization are established public health practices in the  
25 protection of individuals from infectious diseases. Vaccination is not within the scope of  
26 chiropractic practice. The MCA directs its members to not provide advice on the topic of  
27 vaccination and immunization. Patients are encouraged to be an active participant in their  
28 healthcare by making informed decisions. Appropriate sources for patient consultation regarding  
29 vaccination and immunization are public health professionals for whom vaccination and  
30 immunization is within their scope of practice. The MCA regulates the chiropractic profession in  
31 Manitoba under The Chiropractic Act. The MCA is dedicated to regulating the chiropractic  
32 profession in a manner that supports quality care and upholds public trust; as well as furthering  
33 awareness and understanding of the benefits of chiropractic care.”  
34  
35  
36

37 [http://manitobachiropractors.ca/wp-content/uploads/2017/10/Vaccination-and-Immunization-](http://manitobachiropractors.ca/wp-content/uploads/2017/10/Vaccination-and-Immunization-Position-Statement-.pdf)  
38 [Position-Statement-.pdf](http://manitobachiropractors.ca/wp-content/uploads/2017/10/Vaccination-and-Immunization-Position-Statement-.pdf)  
39  
40  
41

42 **British Columbia:**  
43

44 “The British Columbia Chiropractic Association recognizes that vaccination and immunization  
45 are established public health practices in the prevention of infectious diseases. Vaccination is not  
46 within the scope of chiropractic practice. The appropriate sources for patient consultation and  
47 education regarding vaccination and immunization are public health authorities and health  
48 professionals with a scope of practice that includes vaccination.”  
49  
50

51  
52 <https://www.bcchiro.com/about-us/position-statements/>  
53  
54  
55  
56  
57

**Alberta:**

“While the Alberta College and Association of Chiropractors (ACAC) is a strong proponent of preventive health care and the protection of individuals from infectious disease, vaccination and immunization are not within the scope of practice for chiropractic.

The ACAC directs members to refrain from providing advice about vaccination or immunization, and encourages patients to make informed decisions in consultation with public health professionals.

The ACAC regulates the chiropractic profession in Alberta under the Health Professions Act. The ACAC is dedicated to regulating the chiropractic profession in a manner that supports quality care and upholds public trust; as well as furthering awareness and understanding of the benefits of chiropractic care.”

[https://albertachiro.com/ACAC/ChiropracticinAlberta/Regulation\\_and\\_governance/Position\\_statements/ACAC/Chiropractic\\_in\\_Alberta/Regulation%20and%20governance/Position\\_Statements.aspx?hkey=5ae485f3-3101-4f2d-b245-e3b066f6cd01](https://albertachiro.com/ACAC/ChiropracticinAlberta/Regulation_and_governance/Position_statements/ACAC/Chiropractic_in_Alberta/Regulation%20and%20governance/Position_Statements.aspx?hkey=5ae485f3-3101-4f2d-b245-e3b066f6cd01)

**Ontario:**

“As a provincial association, OCA is a charter member of the Canadian Chiropractic Association (CCA). We support the CCA’s Position Statement on Immunization/Vaccination which can be read below, or on the CCA’s site”

<https://www.chiropractic.on.ca/immunization-and-vaccination/>

**Appendix 4:** Notes from the Chiropractic Awareness Council regarding the Standard of Practice on communicating information on vaccination

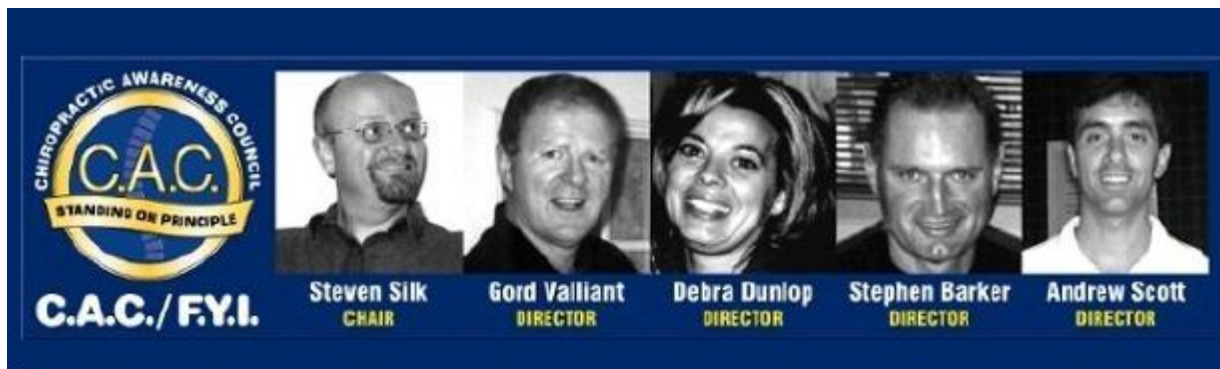

**CAC:FYI - Notes from last CCO Meeting**

From the Desk of Dr. Diane Meyer  
February 10th, 2004  
CCO Observer, Chiropractic Awareness Council

Dear Colleagues,

A little piece of Chiropractic and the honour and privilege that goes with it died today.

I attended my first CCO meeting on Tues Feb. 10th and was witness to the amazing process of how quickly a small group of people can change the face of our profession to an unprecedented degree.

**Here is a synopsis of what happened:**

**Ms. Regina Willmann (public appointed member) is the chair of the Quality Assurance (QA) committee which also consists of Dr. Drew Potter (elected member), Dr. Jeffrey Lustig (non council member), Dr. Allan Gotlib (President, elected member), and Mr. Richard Frame (public appointed member). The QA reviewed the incoming member and public comments and responses concerning the proposed vaccination standard. Ms. Willman reported on the recommendations of the QA committee and stated that it had three versions of the proposed new standard for the CCO's review (see attached). Ms Willman stated that the QA committee underwent a great deal of discussion (4.5 hours) and had a unanimous decision with the new proposals.**

**Next was a viewing of the CBC's Marketplace interview which was aired recently. Although the reason for this viewing was not stated, it was clear to all in attendance that this was presented as an example of what the committee was trying to avoid. Words such as "evangelistic, minority, damaging, radical, and radical minority" were stated by some of the public members (Ms. Willmann and Ms. Helen Foster). The one thing that the Marketplace piece did reveal was the rift in the profession on what the stand of Chiropractic was on the issue of vaccination.**

**Ms. Willman promptly asked for a vote on which of the three proposals should be implemented. At this time Dr. Gotlib asked if we could put the issue to a vote, whereafter, council members asked to view the material first. Following review of the three proposals a**



1  
2  
3  
4 discussion followed. One thing (which is really ironic if you look at it) which was agreed by  
5 the council members was that the section describing the CCO's policy on the effectiveness  
6 of vaccination should be removed. This is the same position statement that the CCA uses.  
7 The end result was an automatic elimination of proposal 2 and 3. Strangely the QA  
8 committee agreed with this.

9  
10 The meeting was often heated and there were feelings of frustration on both sides of the  
11 issue. The view of Ms. Willman and a few other CCO members was that this was an issue of  
12 SCOPE of PRACTICE and that because we do not have the right to administer vaccines we  
13 should not have the right to discuss anything about them. Ms. Willman also expressed her  
14 view that she did not want this issue to drag on due to "the climate towards Chiropractic  
15 out there". I interpret this to mean that there is a strong political force acting against  
16 Chiropractic and this issue may add fuel to the fire. Dr. Gotlib also reviewed the RHPA and  
17 discussed the "risk of harm clause" which will hold a DC liable if any harm was incurred to  
18 a patient after following advise from the DC. Several members expressed their concern of  
19 the infringement on their freedom of speech and their ethical obligation to patients to share  
20 any information they (the Dr.) felt was necessary. Those which expressed their concerns  
21 were Dr's Marshall Deltoff (elected member), Gilles LaMarche (elected member), David  
22 Leprich (elected member), and Lynda Montgomery (elected member). Very vocal opinions  
23 supporting the new standards came from Dr's Potter and Gotlib as well as Ms Willman and  
24 Ms Foster.

25  
26 There was discussion that the standard was not complete and that addendums still needed  
27 to be put together and brought to the board for discussion. This will happen at the next  
28 scheduled board meeting on Friday April 16, 2004.

29  
30 During this discussion Dr Gotlib expressed concern that if there was opposition to this  
31 standard that those in opposition could stand against legal proceedings due to " fiduciary  
32 responsibility" ( the meaning of which was not defined, but the warning came out loud and  
33 clear). Webster's Dictionary defines "fiduciary" as "to be held in trust". One public member  
34 asked if there was not some way that the right to give patients information could be  
35 preserved. To this she was informed that the way our standard was at this time was " not  
36 working". An example of the standard not working was the Marketplace interview which  
37 suggested that the information Dr. Collins gave to her patients was not balanced but  
38 skewed on the side of not vaccinating. At this point Dr. Bruce Walton (non-elected CRC  
39 Chair) said that although this was the slant that Marketplace was trying to get across, he  
40 was able to discern from information which was displayed on the computer screen in the  
41 background of the CBC segment which was aired that indicated Dr. Collins did offer much  
42 more balance information than the interview led us to believe. Meaning, what we heard the  
43 media say and what was said were not always the same thing. The interview was edited to  
44 be negative towards Chiropractors.

45  
46 During the discussion there was a great deal of debate over the words vaccination and  
47 immunization. Dr. Lamarche asked the members to change the wording of the standard so  
48 that immunization was replaced by vaccination. Dr. Gotlib responded by saying that they  
49 are the same thing because that is how medicine and the public perceive it. At this point  
50 Dr. Deltoff read aloud the medical dictionary definitions and explained how they were  
51 indeed very different. Dr. Gotlib again explained that the essence of the two words meant  
52 the same thing and Ms. Willman responded by saying that the public viewed the two words  
53 as the same thing. To this Dr. Deltoff responded that this standard was not written for the  
54 public but for the learned profession which should be using correct terminology. At this  
55 time the members were asked if they would view the two words as the same and a majority



1  
2  
3  
4  
5  
6  
7  
8  
9  
10  
11  
12  
13  
14  
15  
16  
17  
18  
19  
20  
21  
22  
23  
24  
25  
26  
27  
28  
29  
30  
31  
32  
33  
34  
35  
36  
37  
38  
39  
40  
41  
42  
43  
44  
45  
46  
47  
48  
49  
50  
51  
52  
53  
54  
55  
56  
57  
58  
59  
60

of them replied "yes".

Dr. Walton proposed that the wording of vaccination be used instead of immunization and asked if Drs LaMarche and Deltoff would accept the proposal. At this point Ms. Willman asked if Dr's LaMarche and Deltoff would be happy with the standard if they simply changed the word immunization to vaccination. Their response was "it is a start". The issue was then dropped and never returned to.

Further discussion ensued and Dr. Gotlib referred to the OCA, CMCC, and the CCA views on vaccination. These were implied to supposedly be representative of the opinions of the entire profession.

Dr. Deltoff was able to read the ACA stand, and also a position statement by the Association of American Physicians and Surgeons:

"Public policy regarding vaccine is fundamentally flawed. It is permeated by conflicts of interest. It is based on poor scientific methodology (including studies that are too small, too short, and too limited in populations represented), which is, moreover, insulated from independent criticism. The evidence is far too poor to warrant overriding the independent judgments of patients, parents, and attending physicians, even if this were ethically or legally acceptable. Indeed, evidence is accumulating that serious adverse reactions are being ignored."

This was done with some opposition by certain council members but the public members were anxious to hear them. There were several instances when Dr. Deltoff and Dr. LaMarche had to fight to be heard. Ms. Willson reviewed the contents of several legal documents including the RHPA (Regulated Health Professions Act) which discussed the scope of practice issue.

Dr. Gotlib referred to a conversation with Dr. Paul Carey, head of the CCPA who stated that no Chiropractor would be protected by the CCPA if there were any lawsuit arising out of a vaccination issue.

There was further discussion. Dr. Gotlib said that there was much on the agenda to discuss and put the issue to a vote. At this time Ms. Jo-ann Willson (CCO Registrar and General Counsel) adamantly indicated that "there was no way we were ready to make a decision" and suggested that a lunch break take place immediately. Dr. Gotlib suggested that a vote take place anyway to which Ms. Willson responded again that the members could in no way be ready to make this decision.

Lunch followed.

During lunch I was informed by a board member that there were approx. 300 member and public responses and that the breakdown was approximately 50/50. The feedback ranged from very positive to very negative, professional to unprofessional, supportive to vehemently opposed.

To my surprise as we reentered the board room after lunch we had not even sat down yet when Dr. Gotlib again said that the issue was up for a vote. And there you have it... a vote 9:4 in support of the proposed standard of practice denying CCO registered chiropractors from discussing vaccination with their patients. All public members and Dr. Leprich, Dr. Potter and Dr. Brian Schut (elected member) voted for, with opposing views by Dr's Deltoff, LaMarche, Montgomery and Jacques Laquerre (elected member).

Dr. Lamarche asked that his vote be "Noted" for the record as being against this standard. Dr Gotlib then asked to have the members consent to having their name on record so that those in opposition were on record if there were any fiduciary proceedings against them.

That was it guys.... short, fast and definitely not sweet!

The minutes of this meeting will be passed to all members and fully endorsed by the CCO at the next meeting. There may be an opportunity here.

In my opinion there was a deliberate plan in the way that the vote was quickly pushed through after lunch. It happened way too fast. A future meeting will discuss the addendums. Those who support the right to educate patients must be in full force for the next CCO meeting. There is no way to know how that meeting would have gone if there were 40 passionate and professional DC's there.

Our great profession is slipping away right through our fingers. It obvious to me that the medical/pharmaceutical industry has quite a lot of influence on our leaders. While our Boards sit with glazed eyes doing what is "good for the public" our ability to serve the public Chiropractical is being diminished and embraced by the very medical world which has fought so hard against us. Folks, if this keeps up it is clear to me that we will not survive. We will bit by bit be diminished to symptomatic low back technicians... nothing more... nothing less.

I cried that day. Mostly for my patients, both now and in the future. But I also cried in shame of the destruction of the legacy that our Chiropractic forefathers left for us to guard in the Sacred Trust.

This is not a vaccination issue...it is one of principle, ethics and freedom.

Let's hope that we have enough Chiropractors around who are willing to fight for their patients right to undiluted and unadulterated Chiropractic care.

Yours in Chiropractic,

Dr. Diane Meyer

witnessed and acknowledged by Lorri Fleming, CHA

[Back](#)

---

[To CAC Members Menu](#)

---

C.A.C. Head Office  
Toll Free Number: 1-877-997-9927  
Local Calls:(519)822-1879
